# Supplementary material for: Identification of antigen-specific TCR sequences based on biological and statistical enrichment in unselected individuals
Source: PubMed Central journal article supplement (PMC8410028; doi:10.1172/jci.insight.140028), 2021-07-08
Supplement: jciinsight-6-140028-s096.pdf [file jciinsight-6-140028-s096.pdf]

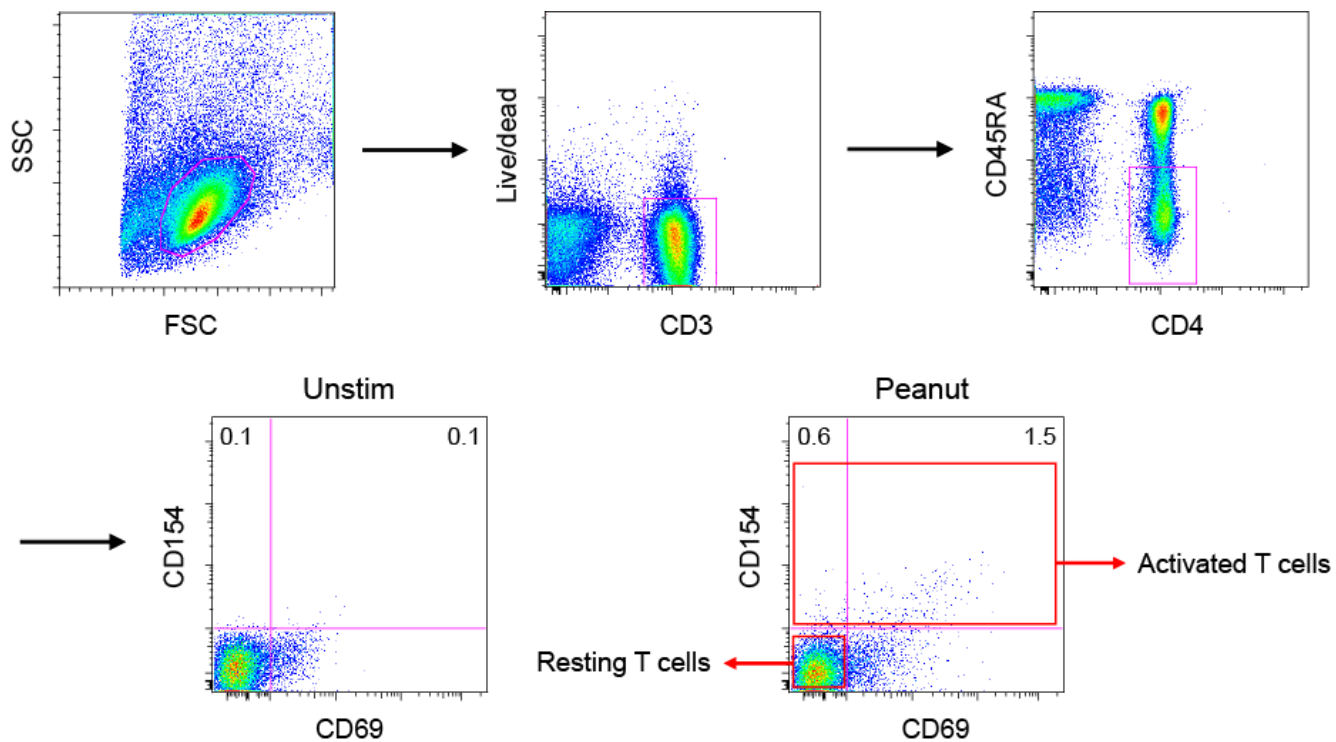

**Supplemental figure 1. FACS gating strategy for isolating peanut-activated memory CD4<sup>+</sup> T cells (CD154<sup>+</sup>) and resting memory CD4<sup>+</sup> T cells (CD154<sup>-</sup>CD69<sup>-</sup>) from the PBMCs of peanut-allergic individuals.**

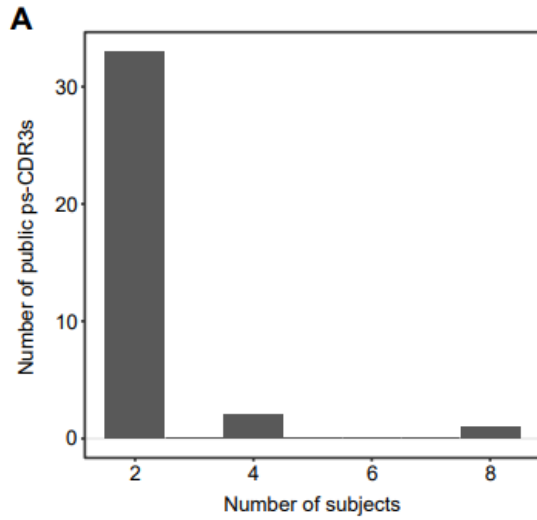

**B**

| ps-CDR3 sequence   | Subject ID |    |    |    |    |    |    |    |    |    |    |    |    |    |    |    |    |    |    |     |     |     |     |     |     |     |     |
|--------------------|------------|----|----|----|----|----|----|----|----|----|----|----|----|----|----|----|----|----|----|-----|-----|-----|-----|-----|-----|-----|-----|
|                    | 1          | 19 | 22 | 24 | 27 | 29 | 33 | 69 | 80 | 81 | 84 | 85 | 89 | 90 | 93 | 94 | 95 | 96 | 97 | 100 | 101 | 104 | 105 | 106 | 107 | 108 | 111 |
| CASSYGDKEYEQYF     |            |    |    |    |    |    |    |    |    |    |    |    |    |    |    |    |    |    |    |     |     |     |     |     |     |     |     |
| CASLEQYNSPLHF      |            |    |    |    |    |    |    |    |    |    |    |    |    |    |    |    |    |    |    |     |     |     |     |     |     |     |     |
| CASSLGLGENYGYTF    |            |    |    |    |    |    |    |    |    |    |    |    |    |    |    |    |    |    |    |     |     |     |     |     |     |     |     |
| CASSLRAENTEAFF     |            |    |    |    |    |    |    |    |    |    |    |    |    |    |    |    |    |    |    |     |     |     |     |     |     |     |     |
| CASSGGNTGELFF      |            |    |    |    |    |    |    |    |    |    |    |    |    |    |    |    |    |    |    |     |     |     |     |     |     |     |     |
| CASSFRFLSGRALNEQFF |            |    |    |    |    |    |    |    |    |    |    |    |    |    |    |    |    |    |    |     |     |     |     |     |     |     |     |
| CASSGHYGYTF        |            |    |    |    |    |    |    |    |    |    |    |    |    |    |    |    |    |    |    |     |     |     |     |     |     |     |     |
| CAWGRNTEAFF        |            |    |    |    |    |    |    |    |    |    |    |    |    |    |    |    |    |    |    |     |     |     |     |     |     |     |     |
| CASSQAGMTEAFF      |            |    |    |    |    |    |    |    |    |    |    |    |    |    |    |    |    |    |    |     |     |     |     |     |     |     |     |
| CASSGTGNQPQHF      |            |    |    |    |    |    |    |    |    |    |    |    |    |    |    |    |    |    |    |     |     |     |     |     |     |     |     |
| CASSIGYQPQHF       |            |    |    |    |    |    |    |    |    |    |    |    |    |    |    |    |    |    |    |     |     |     |     |     |     |     |     |
| CASSLDSNQPQHF      |            |    |    |    |    |    |    |    |    |    |    |    |    |    |    |    |    |    |    |     |     |     |     |     |     |     |     |
| CASRDRGPYEQYF      |            |    |    |    |    |    |    |    |    |    |    |    |    |    |    |    |    |    |    |     |     |     |     |     |     |     |     |
| CASSGQGYGYTF       |            |    |    |    |    |    |    |    |    |    |    |    |    |    |    |    |    |    |    |     |     |     |     |     |     |     |     |
| CASSLGTNNEQFF      |            |    |    |    |    |    |    |    |    |    |    |    |    |    |    |    |    |    |    |     |     |     |     |     |     |     |     |
| CASSSGTSGYEQYF     |            |    |    |    |    |    |    |    |    |    |    |    |    |    |    |    |    |    |    |     |     |     |     |     |     |     |     |
| CASSLRRAEAFF       |            |    |    |    |    |    |    |    |    |    |    |    |    |    |    |    |    |    |    |     |     |     |     |     |     |     |     |
| CSGQNTAEAFF        |            |    |    |    |    |    |    |    |    |    |    |    |    |    |    |    |    |    |    |     |     |     |     |     |     |     |     |
| CSVQNTAEAFF        |            |    |    |    |    |    |    |    |    |    |    |    |    |    |    |    |    |    |    |     |     |     |     |     |     |     |     |
| CASSLPGNTEAFF      |            |    |    |    |    |    |    |    |    |    |    |    |    |    |    |    |    |    |    |     |     |     |     |     |     |     |     |
| CSARNTEAFF         |            |    |    |    |    |    |    |    |    |    |    |    |    |    |    |    |    |    |    |     |     |     |     |     |     |     |     |
| CSVDTAEAFF         |            |    |    |    |    |    |    |    |    |    |    |    |    |    |    |    |    |    |    |     |     |     |     |     |     |     |     |
| CASSQDLGLAGQETQYF  |            |    |    |    |    |    |    |    |    |    |    |    |    |    |    |    |    |    |    |     |     |     |     |     |     |     |     |
| CASSYRVQETQYF      |            |    |    |    |    |    |    |    |    |    |    |    |    |    |    |    |    |    |    |     |     |     |     |     |     |     |     |
| CASSFEANTEAFF      |            |    |    |    |    |    |    |    |    |    |    |    |    |    |    |    |    |    |    |     |     |     |     |     |     |     |     |
| CASSLESNQPQHF      |            |    |    |    |    |    |    |    |    |    |    |    |    |    |    |    |    |    |    |     |     |     |     |     |     |     |     |
| CASSRGYEQYF        |            |    |    |    |    |    |    |    |    |    |    |    |    |    |    |    |    |    |    |     |     |     |     |     |     |     |     |
| CASRGLAGEVEQYF     |            |    |    |    |    |    |    |    |    |    |    |    |    |    |    |    |    |    |    |     |     |     |     |     |     |     |     |
| CASSPDFSGNTIYF     |            |    |    |    |    |    |    |    |    |    |    |    |    |    |    |    |    |    |    |     |     |     |     |     |     |     |     |
| CASSRNTEAFF        |            |    |    |    |    |    |    |    |    |    |    |    |    |    |    |    |    |    |    |     |     |     |     |     |     |     |     |
| CASSESGRNTEAFF     |            |    |    |    |    |    |    |    |    |    |    |    |    |    |    |    |    |    |    |     |     |     |     |     |     |     |     |
| CASSIGLADTQYF      |            |    |    |    |    |    |    |    |    |    |    |    |    |    |    |    |    |    |    |     |     |     |     |     |     |     |     |
| CASSVENTEAFF       |            |    |    |    |    |    |    |    |    |    |    |    |    |    |    |    |    |    |    |     |     |     |     |     |     |     |     |
| CASSLVSQPQHF       |            |    |    |    |    |    |    |    |    |    |    |    |    |    |    |    |    |    |    |     |     |     |     |     |     |     |     |
| CSARDPRPTNEKLF     |            |    |    |    |    |    |    |    |    |    |    |    |    |    |    |    |    |    |    |     |     |     |     |     |     |     |     |
| CASRPTGNTNYGYTF    |            |    |    |    |    |    |    |    |    |    |    |    |    |    |    |    |    |    |    |     |     |     |     |     |     |     |     |

**Supplemental Figure 2: Distribution of public ps-CDR3s across the peanut-allergic subjects.** A, Distribution of the public ps-CDR3s over the subjects. Shown is the number of public ps-CDR3s present in a given number of individuals. B, Summary of the presence of each unique public ps-CDR3 in each subject.

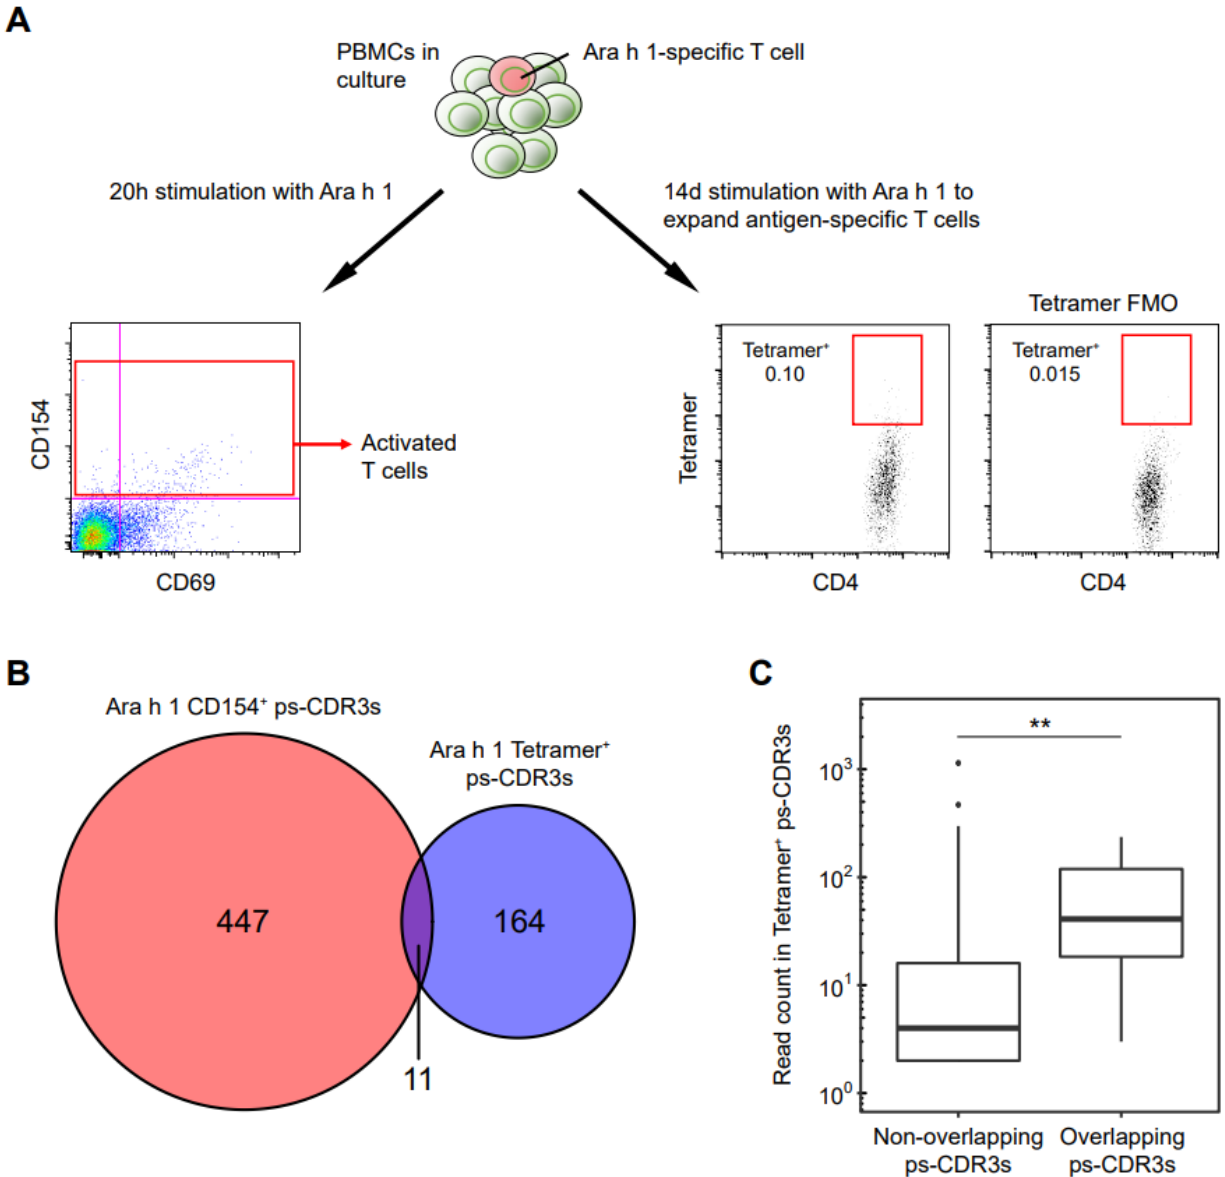

**Supplemental Figure 3: ps-CDR3s from Ara h 1 tetramer<sup>+</sup> T cells are present among ps-CDR3s derived from Ara h 1-activated T cells, and are highly expanded.** A, General schema of the experimental approach. PBMCs from subject 107 were stimulated with the major peanut allergen Ara h 1 (50  $\mu$ g/ml) for 20 hours, and ps-CDR3s were derived from CD154<sup>+</sup> T cells. In addition, PBMCs from the same subject were cultured for 2 weeks with Ara h 1, and ps-CDR3s were derived from sorted Ara h 1 (DRB1\*03:01, AA 415-425) tetramer<sup>+</sup> T cells (see Methods). FMO = Fluorescence-minus-one control. B, Eleven ps-CDR3s from Ara h 1 tetramer<sup>+</sup> T cells were also present in the ps-CDR3 pool from Ara h 1-activated CD154<sup>+</sup> T cells. C, The 11 overlapping ps-CDR3s were more clonally expanded than the other ps-CDR3s derived from Ara h 1 tetramer<sup>+</sup> T cells. Boxplots represent distributions of read counts of the corresponding ps-CDR3 sequences (\*\*  $P < 0.01$ , Mann-Whitney U test).

**A**

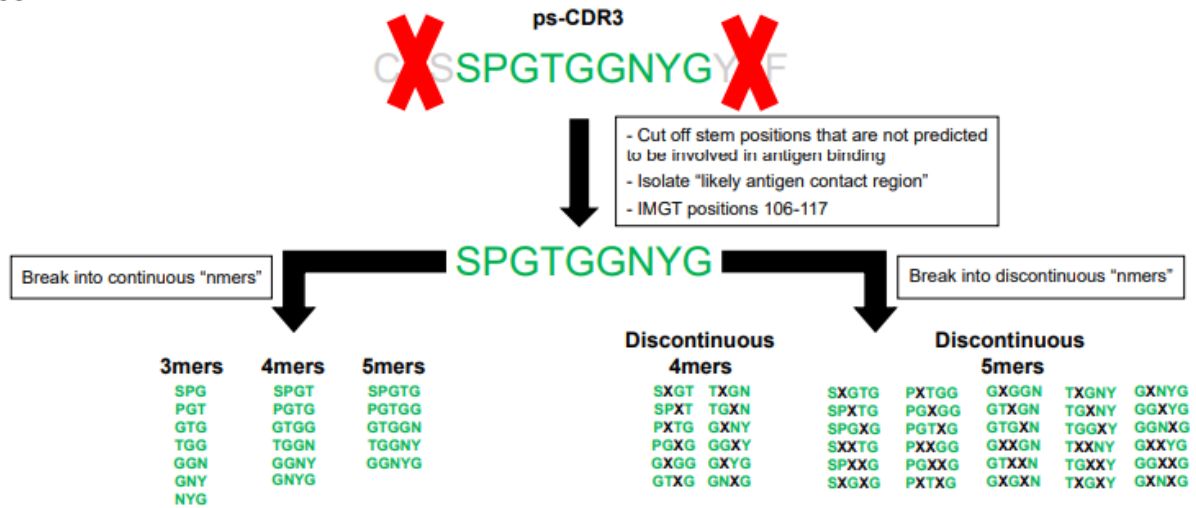

**B**

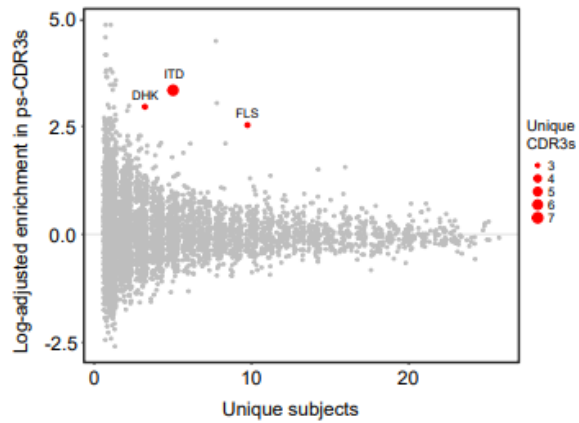

**C**

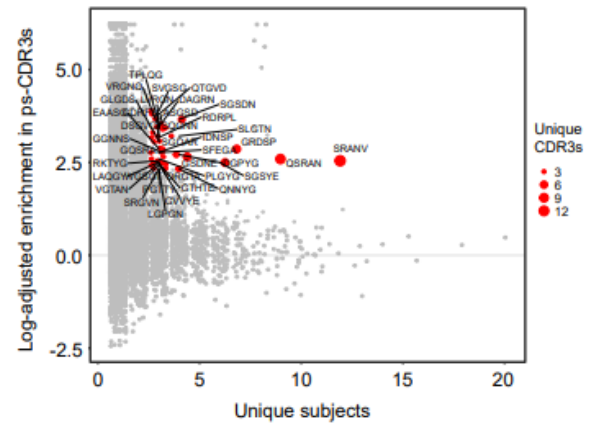

**D**

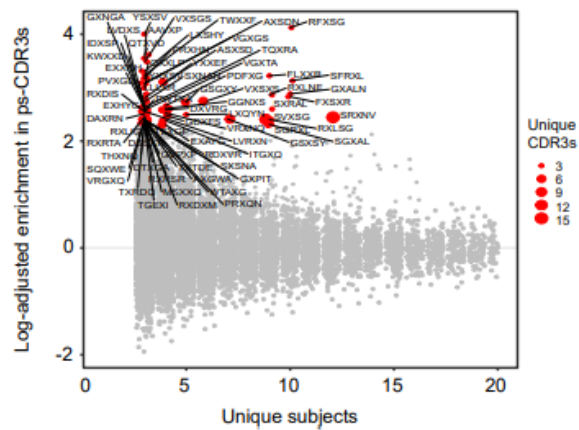

**Supplemental Figure 4: Motif analysis of ps-CDR3s.** A, Schema of nmer generation with an example ps-CDR3 (see Methods). B-D, The ps-CDR3s contain shared and enriched 3-mer, 5-mer, and discontinuous 5-mer motifs as compared to resting CDR3s. Red points represent the most dominant motifs, which were  $\geq 10$ -fold enriched, in  $\geq 3$  unique ps-CDR3s derived from  $\geq 3$  subjects.

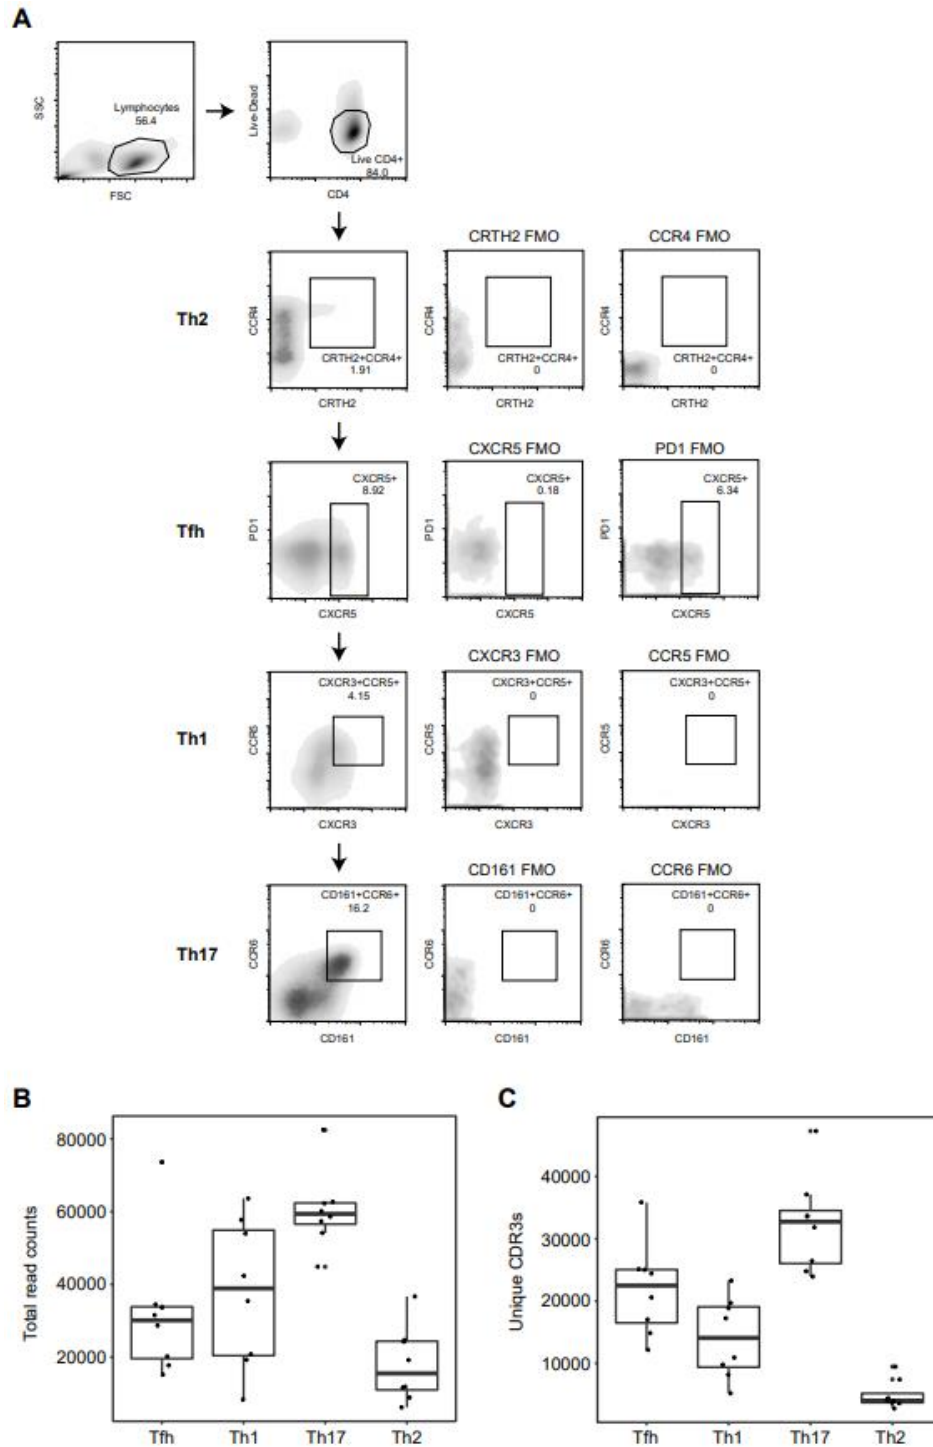

**Supplemental Figure 5: Sorting of T cell subsets from peanut-allergic individuals.** A, FACS gating strategy for isolating bulk memory CD4<sup>+</sup> Th2 (CRTH2<sup>+</sup>CCR4<sup>+</sup>), T<sub>FH</sub> (CXCR5<sup>+</sup>), Th1 (CXCR3<sup>+</sup>CCR5<sup>+</sup>), and Th17 (CD161<sup>+</sup>CCR6<sup>+</sup>) cells (see Methods). FMO = Fluorescence-minus-one control. B, Distribution of the total read counts in the T cell subset samples. C, Distribution of unique CDR3 $\beta$  sequences in the T cell subset samples.

**Supplemental Table 1: Subjects included in each set of experiments described in this paper.**

| <b>Subject ID</b> | <b>TCR<math>\beta</math>-seq CD154+/CD154-</b> | <b>T cell subset sorting</b> | <b>scTCR-seq CD154+</b> | <b>pMHC-Tetramer TCR<math>\beta</math>-seq</b> |
|-------------------|------------------------------------------------|------------------------------|-------------------------|------------------------------------------------|
| 1                 | X                                              |                              |                         |                                                |
| 19                | X                                              |                              |                         |                                                |
| 22                | X                                              | X                            |                         |                                                |
| 24                | X                                              |                              |                         |                                                |
| 27                | X                                              | X                            |                         |                                                |
| 29                | X                                              | X                            |                         |                                                |
| 33                | X                                              | X                            | X                       |                                                |
| 69                | X                                              |                              | X                       |                                                |
| 80                | X                                              |                              |                         |                                                |
| 81                | X                                              | X                            |                         |                                                |
| 84                | X                                              |                              | X                       |                                                |
| 85                | X                                              |                              |                         |                                                |
| 89                | X                                              |                              |                         |                                                |
| 90                | X                                              |                              | X                       |                                                |
| 93                | X                                              |                              | X                       |                                                |
| 94                | X                                              |                              |                         |                                                |
| 95                | X                                              |                              | X                       |                                                |
| 96                | X                                              |                              | X                       |                                                |
| 97                | X                                              | X                            | X                       |                                                |
| 100               | X                                              |                              |                         |                                                |
| 101               | X                                              |                              |                         |                                                |
| 104               | X                                              |                              |                         |                                                |
| 105               | X                                              |                              | X                       |                                                |
| 106               | X                                              | X                            | X                       |                                                |
| 107               | X                                              | X                            | X                       | X                                              |
| 108               | X                                              |                              |                         |                                                |
| 111               | X                                              |                              | X                       |                                                |

**Supplemental Table 2: HLA genotypes of the subjects in this study.**

| Subject ID | DPA1_alle1 | DPA1_alle2 | DPB1_alle1 | DPB1_alle2 | DQA1_alle1 | DQA1_alle2    | DQB1_alle1 | DQB1_alle2 | DRB1_alle1 | DRB1_alle2 | DRB3_alle1 | DRB3_alle2 | DRB4          | DRB5    |
|------------|------------|------------|------------|------------|------------|---------------|------------|------------|------------|------------|------------|------------|---------------|---------|
| 1          | 1:03:01    | 2:02:02    | 1:01:01    | 3:01:01    | 1:03:01    | 3:03:01<br>AM | 3:01:01    | 6:03:01    | 13:01:01   | 4:01:01    | 1:01:02    |            | 1:03:01       |         |
| 19         | 2:01:01    | 2:07:01    | 11:01:01   | 19:01:01   | 1:03:01    | 2:01:01       | 2:02:01    | 6:03:01    | 13:01:01   | 7:01:01    | 2:02:01    |            | 1:01:01       |         |
| 22         | 1:03:01    | 1:03:01    | 4:01:01    | 4:01:01    | 1:02:01    | 3:01:01       | 3:02:01    | 6:02:01    | 15:01:01   | 4:02:01    |            |            | 1:03:01       | 1:01:01 |
| 24         | 2:01:01    | 2:01:02    | 1:01:01    | 17:01:01   | 2:01:01    | 5:01:01       | 2:01:01    | 2:02:01    | 3:01:01    | 7:01:01    | 1:01:02    |            | 1:01:01       |         |
| 27         | 1:03:01    | 2:01:01    | 3:01:01    | 10:01:01   | 1:04:01    | 3:01:01       | 3:02:01    | 5:03:01    | 14:54:01   | 4:01:01    | 2:02:01    |            | 1:03:01       |         |
| 29         | 1:03:01    | 2:01:01    | 4:01:01    | 13:FNVU    | 3:01:01    | 5:05:01       | 3:01:01    | 3:02:01    | 11:04:01   | 4:02:01    | 2:02:01    |            | 1:03:01       |         |
| 33         | 1:03:01    | 2:01:07    | 4:01:01    | 13:FNVU    | 1:02:01    | 3:02:01       | 3:03:02    | 6:09:01    | 13:02:01   | 09:CWA     | 3:01:01    |            | 1:03:02       |         |
| 69         | 1:03:01    | 1:03:01    | 2:01:02    | 13:FNVU    | 1:02:01    | 2:01:01       | 2:02:01    | 6:02:01    | 15:01:01   | 7:01:01    |            |            | 1:01:01       | 1:01:01 |
| 80         | 1:03:01    | 2          | 4:01:01    | 85:01:01   | 2:01:01    | 5:01:01       | 2:01:01    | 2:02:01    | 3:01:01    | 7:01:01    | 1:01:01    |            | 1:03:01       |         |
| 81         | 1:03:01    | 1:03:01    | 2:01:01    | 4:01:01    | 1:02:01    | 3:01:01       | 3:02:01    | 6:02:01    | 15:01:01   | 4:02:01    |            |            | 1:03:01       | 1:01:01 |
| 84         | 1:03:01    | 2:01:01    | 4:01:01    | 10:01:01   | 1:01:02    | 1:02:01       | 5:01:01    | 6:09:01    | 1:02:01    | 13:02:01   | 3:01:01    | 3:01:01    |               |         |
| 85         | 1:03:01    | 1:03:01    | 4:01:01    | 4:02:01    | 5:01:01    | 5:01:01       | 2:01:01    | 2:01:01    | 3:01:01    | 3:01:01    | 1:01:02    | 1:01:02    |               |         |
| 89         | 1:03:01    | 2:06       | 4:02:01    | 5:01:01    | 1:02:01    | 1:02:01       | 6:02:01    | 6:02:01    | 15:01:01   | 15:01:01   |            |            |               | 1:01:01 |
| 90         | 1:03:01    | 1:03:01    | 4:01:01    | 4:01:01    | 5:01:01    | 5:05:01       | 2:01:01    | 3:01:01    | 3:01       | 11:01      | 1:01:02    | 2:02:01    |               |         |
| 93         |            |            | 4:01:01    | 4:01:01    | 1:04:01    | 5:01:01       | 2:01:01    | 5:03:01    | 3:01:01    | 14:01:01   | 1:01:02    | 2:24       |               |         |
| 94         | 1:03:01    | 1:03:01    | 2:01:02    | 4:01:01    | 1:01:01    | 1:02:01       | 5:01:01    | 6:02:01    | 1:03:01    | 15:01:01   |            |            |               | 1:01:01 |
| 95         | 1:03:01    | 1:03:01    | 4:01:01    | 4:01:01    | 1:02:01    | 5:05:01       | 3:01:01    | 6:02:01    | 15:01:01   | 11:01:01   | 2:02:01    |            |               | 1:01:01 |
| 96         | 1:03:01    | 2:01:02    | 1:01:01    | 2:01:02    | 3:03:01    | 5:05:01       | 3:01:01    | 3:02:01    | 12:JV      | 4:01:01    | 2:02:01    |            | 1:03:01       |         |
| 97         | 1:03:01    | 1:03:01    | 2:01:02    | 48:01:00   | 3:01:01    | 5:03:01       | 3:01:01    | 3:02:01    | 13:12:01   | 4:03:01    | 2:02:01    |            | 1:03:01       |         |
| 100        | 1:03:01    | 1:03:01    | 2:01:02    | 4:01:01    | 5:05:01    | 5:05:01       | 3:01:01    | 3:01:01    | 11:04:01   | 11:04:01   | 2:02:01    | 2:02:01    |               |         |
| 101        | 1:03:01    | 1:03:01    | 3:01:01    | 4:01:01    | 1:02:01    | 1:02:01       | 6:02:01    | 6:04:01    | 15:01:01   | 13:02:01   | 3:01:01    |            |               | 1:01:01 |
| 104        | 1:03:01    | 1:03:01    | 4:01:01    | 4:01:01    | 1:02:01    | 2:01:01       | 3:03:02    | 6:02:01    | 15:01:01   | 7:01:01    |            |            | 01:03:01<br>N | 1:01:01 |
| 105        | 1:03:01    | 2:01:01    | 2:01:02    | 5:01:01    | 3:01:01    | 5:01:01       | 2:01:01    | 3:02:01    | 3:01:01    | 4:02:01    | 1:01:02    |            | 1:03:01       |         |
| 106        | 1:03:01    | 1:03:01    | 4:01:01    | 104:01:01  | 1:01:02    | 2:01:01       | 3:01:01    | 5:01:01    | 1:02:01    | 7:01:01    |            |            | 1:01:01       |         |
| 107        | 1:03:01    | 1:03:01    | 4:01:01    | 20:01:01   | 3:01:01    | 5:01:01       | 2:01:01    | 3:02:01    | 3:01:01    | 4:04:01    | 1:01:02    |            | 1:03:01       |         |
| 108        | 1:03:01    | 1:03:01    | 3:01:01    | 4:02:01    | 1:02:01    | 5:01:01       | 2:01:01    | 6:04:01    | 3:01:01    | 13:02:01   | 1:01:02    | 3:01:01    |               |         |
| 111        | 1:03:01    | 1:03:01    | 2:01:02    | 4:01:01    | 1:03:01    | 5:05:01       | 3:01:01    | 6:03:01    | 13:01:01   | 13:05:01   | 1:01:02    | 2:02:01    |               |         |
